# Supplementary material
Source: PubMed Central journal article supplement (PMC3497159)

Table S1: Characteristics of the *P. aeruginosa* isolates

| Alias  | Year | Origin | City     | Country | Sample          | Drug-resistance | ST    | Ref |
|--------|------|--------|----------|---------|-----------------|-----------------|-------|-----|
| FrNa1  | 2010 | Human  | Narbonne | France  | Catheter        | XDR             |       |     |
| FrNa2  | 2010 | Human  | Narbonne | France  | Urine           | MDR             |       |     |
| FrNa3  | 2010 | Human  | Narbonne | France  | Urine           | MDR             |       |     |
| FrNa4  | 2010 | Human  | Narbonne | France  | Urine           | MDR             |       |     |
| FrNa5  | 2010 | Human  | Narbonne | France  | Urethral swab   | MDR             |       |     |
| FrNa6  | 2010 | Human  | Narbonne | France  | Urine           | MDR             |       |     |
| FrNa7  | 2010 | Human  | Narbonne | France  | Catheter        | MDR             | ST235 |     |
| FrNa8  | 2010 | Human  | Narbonne | France  | Catheter        | MDR             |       |     |
| FrNa9  | 2010 | Human  | Narbonne | France  | Catheter        | XDR             |       |     |
| FrNa10 | 2010 | Human  | Narbonne | France  | Urine           | MDR             |       |     |
| FrNa11 | 2010 | Human  | Narbonne | France  | Urine           | MDR             |       |     |
| FrNa12 | 2010 | Human  | Narbonne | France  | Urine           | MDR             |       |     |
| FrNa13 | 2010 | Human  | Narbonne | France  | BAL             | MDR             |       |     |
| FrNa14 | 2010 | Human  | Narbonne | France  | Urine           | MDR             |       |     |
| FrNa15 | 2010 | Human  | Narbonne | France  | BAL             | MDR             |       |     |
| FrNa16 | 2010 | Human  | Narbonne | France  | Urine           | MDR             | ST235 |     |
| FrNa17 | 2010 | Human  | Narbonne | France  | Rectal swab     | MDR             |       |     |
| FrNa18 | 2010 | Human  | Narbonne | France  | PLE             | MDR             |       |     |
| FrNa19 | 2010 | Human  | Narbonne | France  | PLE             | MDR             |       |     |
| FrNa20 | 2010 | Human  | Narbonne | France  | PLE             | MDR             |       |     |
| FrNa21 | 2010 | Human  | Narbonne | France  | Pus             | MDR             | ST175 |     |
| FrNa22 | 2010 | Human  | Narbonne | France  | Catheter        | MDR             |       |     |
| FrNa23 | 2010 | Human  | Narbonne | France  | PLE             | MDR             | ST308 |     |
| FrNa24 | 2010 | Human  | Narbonne | France  | Pus             | MDR             |       |     |
| FrNa25 | 2010 | Human  | Narbonne | France  | Catheter        | MDR             |       |     |
| FrNa26 | 2010 | Human  | Narbonne | France  | PLE             | MDR             |       |     |
| FrNa27 | 2010 | Human  | Narbonne | France  | PLE             | MDR             |       |     |
| FrNa28 | 2010 | Human  | Narbonne | France  | PLE             | MDR             |       |     |
| FrNa29 | 2011 | Human  | Narbonne | France  | BAL             | XDR             |       |     |
| FrNa30 | 2011 | Human  | Narbonne | France  | BAL             | XDR             |       |     |
| FrCl7  | 2011 | Human  | Clamart  | France  | Blood           | XDR             | ST111 |     |
| FrCl8  | 2011 | Human  | Clamart  | France  | BAL             | XDR             |       |     |
| FrCl9  | 2011 | Human  | Clamart  | France  | Blood           | XDR             |       |     |
| FrCl10 | 2011 | Human  | Clamart  | France  | Blood           | MDR             |       |     |
| FrCl11 | 2011 | Human  | Clamart  | France  | Superficial pus | MDR             | ST235 |     |
| FrCl12 | 2011 | Human  | Clamart  | France  | BAL             | MDR             |       |     |
| FrCl13 | 2011 | Human  | Clamart  | France  | Bone biopsy     | MDR             |       |     |
| FrCl15 | 2011 | Human  | Clamart  | France  | Superficial pus | MDR             |       |     |
| FrCl16 | 2011 | Human  | Clamart  | France  | Bone biopsy     | MDR             |       |     |
| FrCl19 | 2011 | Human  | Clamart  | France  | Bone biopsy     | MDR             |       |     |
| FrCl20 | 2011 | Human  | Clamart  | France  | Urine           | MDR             |       |     |
| FrCl21 | 2011 | Human  | Clamart  | France  | Urine           | MDR             |       |     |
| FrCl22 | 2011 | Human  | Clamart  | France  | Urine           | MDR             |       |     |

|        |      |       |         |         |               |     |       |     |
|--------|------|-------|---------|---------|---------------|-----|-------|-----|
| FrCl23 | 2011 | Human | Clamart | France  | Urine         | MDR |       |     |
| FrCl24 | 2011 | Human | Clamart | France  | Urine         | XDR |       |     |
| FrCl25 | 2011 | Human | Clamart | France  | Urine         | MDR |       |     |
| FrCl26 | 2011 | Human | Clamart | France  | Urine         | MDR |       |     |
| Ko1    | 2005 | Human | Daegu   | Korea   | Wound swab    | MDR |       | (1) |
| Ko2    | 2005 | Human | Daegu   | Korea   | UN            | MDR | ST235 | (1) |
| Ko3    | 2006 | Human | Daegu   | Korea   | Wound swab    | MDR | ST235 | (1) |
| Ko4    | 2006 | Human | Daegu   | Korea   | Urine         | MDR |       | (1) |
| Ko5    | 2006 | Human | Daegu   | Korea   | Others        | MDR |       | (1) |
| Ko6    | 2006 | Human | Daegu   | Korea   | Blood         | MDR | ST560 | (1) |
| Ko7    | 2006 | Human | Daegu   | Korea   | Wound swab    | MDR |       | (1) |
| Ko8    | 2006 | Human | Daegu   | Korea   | Sputum        | MDR |       | (1) |
| Ko10   | 2006 | Human | Daegu   | Korea   | Bile          | XDR |       | (1) |
| Ko11   | 2005 | Human | Daegu   | Korea   | UN            | MDR |       | (1) |
| Ko13   | 2005 | Human | Daegu   | Korea   | Wound swab    | MDR |       | (1) |
| Ko14   | 2006 | Human | Daegu   | Korea   | Urine         | MDR |       | (1) |
| Ko15   | 2005 | Human | Daegu   | Korea   | Sputum        | MDR |       | (1) |
| Ko16   | 2006 | Human | Daegu   | Korea   | Urine         | MDR |       | (1) |
| Ko18   | 2006 | Human | Daegu   | Korea   | Urine         | XDR |       | (1) |
| Ko19   | 2005 | Human | Daegu   | Korea   | Urine         | MDR |       | (1) |
| Ko20   | 2006 | Human | Daegu   | Korea   | Ascitic fluid | XDR |       | (1) |
| Ko21   | 2006 | Human | Daegu   | Korea   | Sputum        | MDR |       | (1) |
| Ko22   | 2006 | Human | Daegu   | Korea   | Wound swab    | MDR |       | (1) |
| Ko23   | 2006 | Human | Daegu   | Korea   | UN            | XDR |       | (1) |
| Ko24   | 2005 | Human | Daegu   | Korea   | Wound swab    | MDR |       | (1) |
| Ko25   | 2005 | Human | Daegu   | Korea   | Urine         | MDR |       | (1) |
| Ko26   | 2006 | Human | Daegu   | Korea   | UN            | XDR |       | (1) |
| Ko27   | 2006 | Human | Daegu   | Korea   | Blood         | MDR |       | (1) |
| Ko31   | 2005 | Human | Daegu   | Korea   | Wound swab    | MDR |       | (1) |
| Ko32   | 2005 | Human | Daegu   | Korea   | Sputum        | MDR |       | (1) |
| Ko33   | 2005 | Human | Daegu   | Korea   | Bile          | MDR |       | (1) |
| Ko34   | 2005 | Human | Daegu   | Korea   | UN            | MDR |       | (1) |
| Ko35   | 2005 | Human | Daegu   | Korea   | Wound swab    | MDR |       | (1) |
| Ko37   | 2005 | Human | Daegu   | Korea   | Urine         | MDR |       | (1) |
| Ko38   | 2006 | Human | Daegu   | Korea   | Sputum        | MDR |       |     |
| Ko39   | 2006 | Human | Daegu   | Korea   | Urine         | XDR |       |     |
| Ko41   | 2005 | Human | Daegu   | Korea   | Urine         | MDR |       |     |
| Ko42   | 2005 | Human | Daegu   | Korea   | Urine         | MDR |       |     |
| Ko43   | 2006 | Human | Daegu   | Korea   | Ascitic fluid | MDR |       |     |
| Ko45   | 2006 | Human | Daegu   | Korea   | Wound swab    | MDR |       |     |
| Ko46   | 2005 | Human | Daegu   | Korea   | UN            | MDR |       |     |
| Ko47   | 2005 | Human | Daegu   | Korea   | Wound swab    | XDR |       |     |
| Ko48   | 2005 | Human | Daegu   | Korea   | Urine         | XDR |       |     |
| Ko49   | 2005 | Human | Daegu   | Korea   | UN            | XDR |       |     |
| Hu1    | 2001 | Human | Szolnok | Hungary | UN            | MDR |       |     |

|      |      |        |                |         |            |              |       |     |
|------|------|--------|----------------|---------|------------|--------------|-------|-----|
| Hu2  | 2005 | Human  | Belgrade       | Serbia  | UN         | MDR          |       |     |
| Hu3  | 2005 | Human  | Budapest       | Hungary | Urine      | MDR          | ST395 | (2) |
| Hu4  | 2006 | Human  | Székesfehérvár | Hungary | Bile       | MDR          |       |     |
| Hu5  | 2007 | Human  | Szolnok        | Hungary | Wound swab | MDR          | ST175 | (2) |
| Hu6  | 2002 | Human  | Budapest       | Hungary | Urine      | MDR          | ST229 | (3) |
| Hu7  | 2003 | Human  | Pécs           | Hungary | Urine      | MDR          | ST229 | (3) |
| Hu8  | 2002 | Human  | Tatabánya      | Hungary | Eye        | epidemic     |       |     |
| Hu9  | 2005 | Human  | Mosonmagyar.   | Hungary | Blood      | MDR          | ST235 | (3) |
| Hu10 | 2003 | Human  | Budapest       | Hungary | Blood      | MDR          |       |     |
| Hu11 | 2004 | Human  | Budapest       | Hungary | Blood      | invasive     |       |     |
| Hu12 | 2004 | Human  | Székesfehérvár | Hungary | Blood      | MDR          |       |     |
| Hu13 | 2004 | Human  | Tatabánya      | Hungary | Blood      | MDR          |       |     |
| Hu14 | 2004 | Human  | Gyula          | Hungary | Blood      | MDR          |       |     |
| Hu16 | 2006 | Human  | Veszprém       | Hungary | Blood      | epidemic     |       |     |
| Hu17 | 2006 | Mouse  | Budapest       | Hungary | autopsy    | experimental |       |     |
| Hu18 | 2006 | Bovine | n.a.           | Hungary | Faeces     | healthy      |       | (4) |
| Hu19 | 2006 | Bovine | n.a.           | Hungary | Milk       | healthy      |       | (4) |
| Hu20 | 2006 | Bovine | n.a.           | Hungary | Milk       | healthy      |       | (4) |
| Ro1  | 2001 | Human  | Bucharest      | Romania | TS         | MDR          | ST235 |     |
| Ro2  | 2001 | Human  | Bucharest      | Romania | TS         | MDR          | ST235 |     |
| Ro3  | 2001 | Human  | Bucharest      | Romania | BAL        | MDR          | ST235 |     |
| Ro4  | 2002 | Human  | Bucharest      | Romania | BrA        | MDR          | ST235 |     |
| Ro5  | 2002 | Human  | Bucharest      | Romania | BAL        | MDR          | ST235 |     |
| Ro6  | 2003 | Human  | Bucharest      | Romania | BAL        | MDR          | ST235 |     |
| Ro7  | 2003 | Human  | Bucharest      | Romania | BAL        | MDR          | ST235 |     |
| Ro8  | 2003 | Human  | Bucharest      | Romania | BAL        | MDR          | ST235 |     |
| Ro9  | 2004 | Human  | Bucharest      | Romania | PLE        | MDR          | ST235 |     |
| Ro10 | 2004 | Human  | Bucharest      | Romania | TA         | MDR          | ST266 |     |
| Ro11 | 2004 | Human  | Bucharest      | Romania | TA         | MDR          | ST235 |     |
| Ro12 | 2004 | Human  | Bucharest      | Romania | BrA        | MDR          | ST713 |     |
| Ro13 | 2004 | Human  | Bucharest      | Romania | TA         | MDR          | ST111 |     |
| Ro14 | 2004 | Human  | Bucharest      | Romania | PLE        | MDR          | ST712 |     |
| Ro15 | 2004 | Human  | Bucharest      | Romania | TS         | MDR          | ST235 |     |
| Ro16 | 2004 | Human  | Bucharest      | Romania | TBA        | MDR          | ST235 |     |
| Ro17 | 2004 | Human  | Bucharest      | Romania | TS         | MDR          | ST235 |     |
| Ro18 | 2003 | Human  | Bucharest      | Romania | PLE        | MDR          | ST712 |     |

Legend: BAL            Bronchoalveolar lavage  
TBA            Tracheobronchial aspirate  
PLE            Pleural exudate  
TS            Tracheal secretion  
TA            Tracheal aspirate  
BrA            Bronchial aspirate

## References

1. Nho, S. O., J. S. Jin, J. W. Kim, J. Y. Oh, J. Kim, Y. C. Lee, S. Y. Seol, D. T. Cho, and J. C. Lee. 2008. Dissemination of the blaIMP-1 and blaVIM-2 metallo-beta-lactamase genes among genetically unrelated *Pseudomonas aeruginosa* isolates in a South Korean hospital. *Int J Antimicrob Agents* 31:586-8.
2. Libisch, B., B. Balogh, and M. Fuzi. 2009. Identification of two multidrug-resistant *Pseudomonas aeruginosa* clonal lineages with a countrywide distribution in Hungary. *Curr Microbiol* 58:111-6.
3. Libisch, B., J. Watine, B. Balogh, M. Gacs, M. Muzslay, G. Szabo, and M. Fuzi. 2008. Molecular typing indicates an important role for two international clonal complexes in dissemination of VIM-producing *Pseudomonas aeruginosa* clinical isolates in Hungary. *Res Microbiol* 159:162-8.
4. Szmolka, A., B. Libisch, J. Paszti, M. Fuzi, L. Emody, and B. Nagy. 2009. Virulence and antimicrobial resistance determinants of human pathogenic and commensal strains of *Pseudomonas aeruginosa*. *Acta Microbiol Immunol Hung* 56:399-402.



|      |   |   |   |    |    |   |   |   |    |   |       |
|------|---|---|---|----|----|---|---|---|----|---|-------|
| Ko2  | R | R | R | R  | R  | R | R | R | R  | S | IMP-1 |
| Ko3  | R | R | S | R  | R  | R | R | R | R  | S | IMP-1 |
| Ko4  | R | S | S | R  | R  | R | R | S | R  | R | IMP-1 |
| Ko5  | R | R | R | R  | R  | R | R | R | R  | S | IMP-1 |
| Ko6  | R | s | S | R  | R  | R | R | S | R  | S | IMP-1 |
| Ko7  | R | S | S | R  | R  | R | R | S | R  | S | IMP-1 |
| Ko8  | R | R | R | R  | R  | R | R | R | R  | S | IMP-1 |
| Ko10 | R | R | R | R  | R  | R | R | R | R  | R | IMP-1 |
| Ko11 | R | R | S | R  | R  | R | R | R | R  | S | IMP-1 |
| Ko13 | R | S | S | R  | R  | R | R | S | R  | S | IMP-1 |
| Ko14 | R | S | S | R  | R  | R | R | S | R  | S | IMP-1 |
| Ko15 | R | R | R | R  | R  | R | R | R | R  | S | IMP-1 |
| Ko16 | R | S | S | R  | R  | R | R | S | R  | S | IMP-1 |
| Ko18 | R | R | R | R  | R  | R | R | R | R  | R | IMP-1 |
| Ko19 | R | S | S | R  | R  | R | R | R | R  | S | IMP-1 |
| Ko20 | R | R | R | R  | R  | R | R | R | R  | R | IMP-1 |
| Ko21 | R | R | R | R  | R  | R | R | R | R  | S | IMP-1 |
| Ko22 | R | R | R | R  | R  | R | R | R | R  | S | IMP-1 |
| Ko23 | R | R | R | R  | R  | R | R | R | R  | R | IMP-1 |
| Ko24 | R | R | R | R  | R  | R | R | R | R  | S | IMP-1 |
| Ko25 | R | R | R | R  | R  | R | R | S | R  | S | IMP-1 |
| Ko26 | R | R | R | R  | R  | R | R | R | R  | R | IMP-1 |
| Ko27 | R | R | R | R  | R  | R | R | R | R  | S | IMP-1 |
| Ko31 | R | R | R | R  | R  | R | R | R | R  | S | IMP-1 |
| Ko32 | R | R | S | R  | R  | R | R | R | R  | S | IMP-1 |
| Ko33 | R | R | S | R  | R  | R | R | S | R  | S | IMP-1 |
| Ko34 | R | R | R | R  | R  | R | R | R | R  | S | VIM-2 |
| Ko35 | R | S | S | R  | R  | R | R | S | R  | S | IMP-1 |
| Ko37 | R | R | S | R  | R  | R | R | R | R  | R |       |
| Ko38 | R | R | R | R  | NT | R | R | R | S  | R |       |
| Ko39 | R | R | R | R  | NT | R | R | R | R  | R |       |
| Ko41 | R | R | S | R  | NT | S | S | R | S  | S |       |
| Ko42 | R | R | R | R  | NT | R | R | R | R  | R |       |
| Ko43 | R | R | R | R  | NT | R | R | R | S  | R |       |
| Ko45 | R | R | R | R  | NT | R | R | R | S  | R |       |
| Ko46 | R | S | R | R  | NT | S | R | R | S  | R |       |
| Ko47 | R | R | R | R  | NT | R | R | R | R  | R |       |
| Ko48 | R | R | R | R  | NT | R | R | R | R  | R |       |
| Ko49 | R | R | R | R  | NT | R | R | R | R  | R |       |
| Hu1  | R | R | R | S  | NT | R | R | R | R  | R |       |
| Hu2  | R | R | R | S  | NT | R | R | R | R  | R |       |
| Hu3  | R | R | R | S  | NT | R | R | R | R  | R |       |
| Hu4  | R | R | S | I  | NT | R | R | R | R  | R |       |
| Hu5  | R | R | R | I  | NT | R | R | R | R  | R |       |
| Hu6  | R | R | R | R  | NT | R | R | R | R  | R |       |
| Hu7  | R | R | R | R  | NT | R | R | R | R  | I |       |
| Hu8  | S | S | S | NT | NT | S | S | S | NT | I |       |
| Hu9  | R | R | R | R  | NT | R | R | R | R  | I | VIM-4 |
| Hu10 | R | R | S | NT | NT | R | R | R | NT | R |       |
| Hu11 | S | S | S | NT | NT | R | I | S | NT | R |       |

|      |   |   |   |    |    |   |   |   |    |   |
|------|---|---|---|----|----|---|---|---|----|---|
| Hu12 | R | R | R | NT | NT | I | S | R | NT | R |
| Hu13 | R | R | R | NT | NT | I | S | R | NT | R |
| Hu14 | R | R | R | NT | NT | I | S | R | NT | R |
| Hu16 | S | S | S | NT | NT | S | S | S | NT | S |
| Hu17 | S | S | S | NT | NT | S | S | S | NT | I |
| Hu18 | S | S | S | NT | NT | S | S | S | NT | I |
| Hu19 | S | S | S | NT | NT | S | S | S | NT | I |
| Hu20 | S | S | S | NT | NT | S | S | S | NT | S |
| Ro1  | R | I | S | R  | NT | R | R | R | R  | R |
| Ro2  | R | R | R | R  | NT | R | R | R | R  | R |
| Ro3  | R | R | R | R  | NT | R | R | R | R  | R |
| Ro4  | R | R | R | R  | NT | R | R | R | R  | R |
| Ro5  | R | R | R | R  | NT | R | R | R | R  | R |
| Ro6  | R | R | R | R  | NT | R | R | R | R  | R |
| Ro7  | R | R | R | R  | NT | R | R | R | R  | R |
| Ro8  | R | R | R | R  | NT | R | R | R | R  | R |
| Ro9  | R | R | R | R  | NT | R | R | R | R  | R |
| Ro10 | I | S | I | S  | NT | R | S | I | R  | I |
| Ro11 | R | R | R | R  | NT | R | R | R | R  | R |
| Ro12 | R | S | R | R  | NT | R | R | S | R  | R |
| Ro13 | R | R | S | R  | NT | R | R | R | R  | R |
| Ro14 | S | S | R | R  | NT | R | I | S | R  | R |
| Ro15 | R | R | R | R  | NT | R | R | R | R  | R |
| Ro16 | R | R | R | R  | NT | R | R | R | R  | R |
| Ro17 | R | S | S | R  | NT | R | I | R | R  | R |
| Ro18 | I | S | R | R  | NT | R | R | S | R  | R |

Figure S1: clustering analysis of 126 isolates

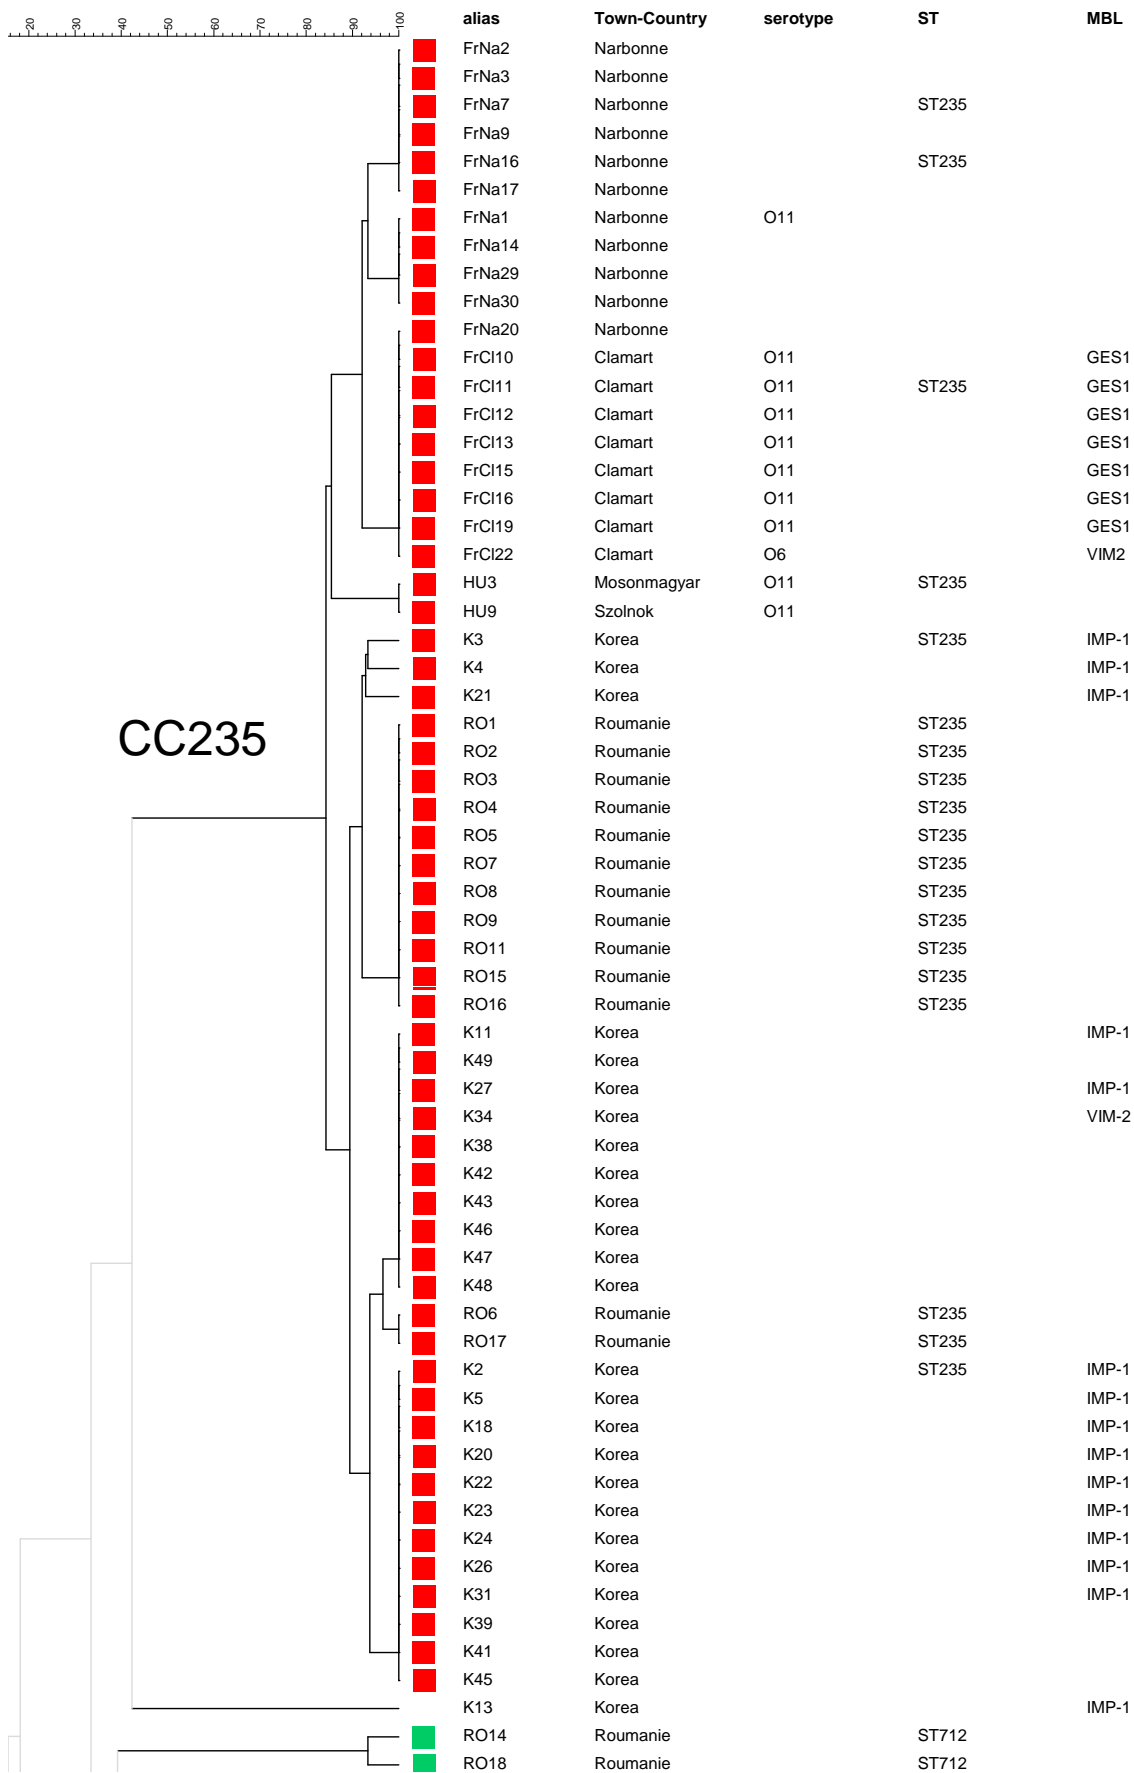



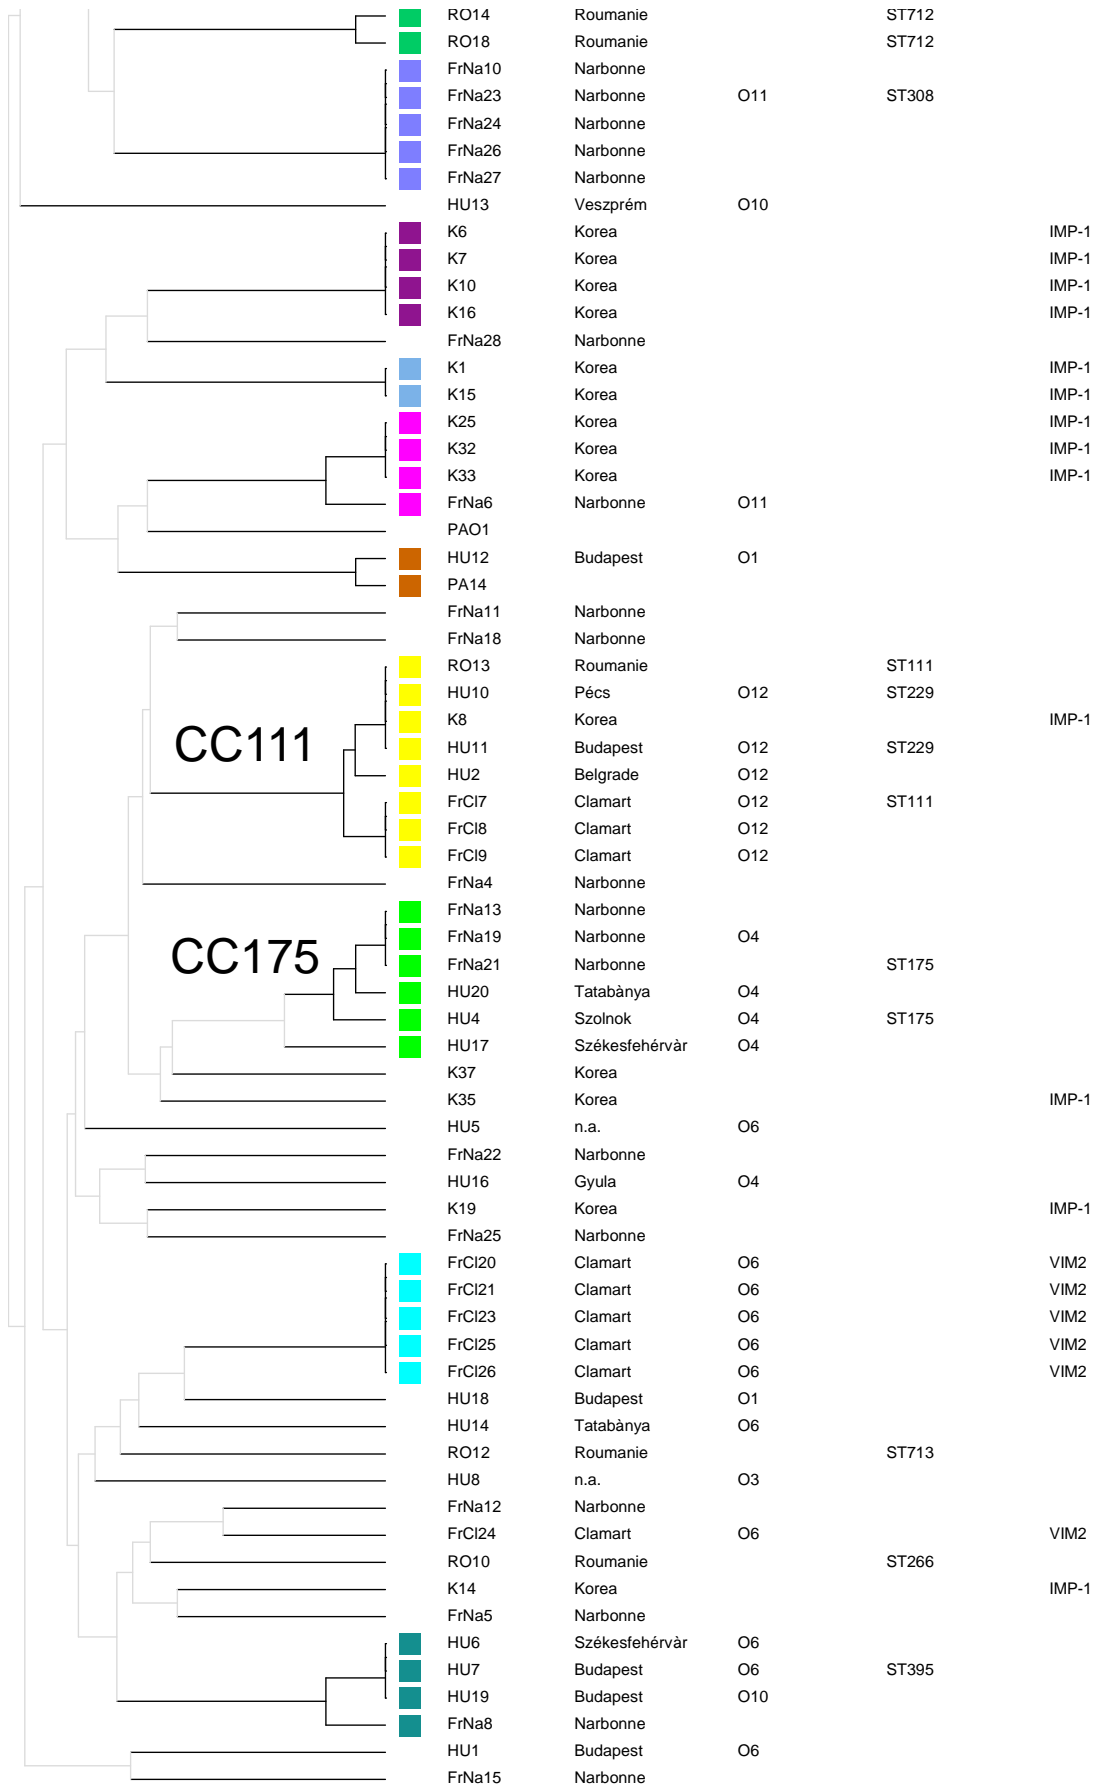

Supplement: AAC.01233-12_zac999101396so1.pdf [file AAC.01233-12_zac999101396so1.pdf]
